# Supplementary material for: Adjustable electronic performances and redox ability of a g-C3N4monolayer by adsorbing nonmetal solute ions: a first principles study
Source: Royal Society of Chemistry journal article supplement (doi:10.1039/c6ta06628c), 2016-01-01
Supplement: c6ta06628c1.pdf [file c6ta06628c1.pdf]

## Supplementary information

### Adjustable electronic performances and redox ability of g-C<sub>3</sub>N<sub>4</sub> monolayer by absorbing nonmetal solute ions: A first principles study

S. Lu<sup>1</sup>, Z. W. Chen<sup>2</sup>, C. Li<sup>1\*</sup>, H. H. Li<sup>1</sup>, Y. F. Zhao<sup>1</sup>, Y. Y. Gong<sup>1</sup>, L. Y. Niu<sup>1</sup>, X.

J. Liu<sup>1</sup> T. Wang<sup>3</sup> and C. Q. Sun<sup>1,4</sup>

<sup>1</sup> Center for Coordination Bond Engineering, College of Materials Science and Engineering, China Jiliang University, Hangzhou 310018, China

<sup>2</sup> Key Laboratory of Automobile Materials, Ministry of Education, Department of Materials Science and Engineering, Jilin University, Changchun 130022, China

<sup>3</sup> College of Electrical Engineering, Zhejiang University, Hangzhou 310027, China

<sup>4</sup> School of Electrical and Electronic Engineering, Nanyang Technological University, Singapore 639798

\*E-mail: [canli1983@gmail.com](mailto:canli1983@gmail.com)

Table S1. The wavelength of optical absorption edges  $\lambda_{\text{edge}}$  with unit nm. The integral area of optical absorption curves in ultraviolet ( $S_{\text{UV}}$ ) and visible light ( $S_{\text{V}}$ ) regions with uniform unit.

| system   | $\lambda_{\text{edge}}$ |     | $S_{\text{UV}}$ |     | $S_{\text{V}}$ |     |
|----------|-------------------------|-----|-----------------|-----|----------------|-----|
|          | 2×2                     | 3×3 | 2×2             | 3×3 | 2×2            | 3×3 |
| pristine | 455                     | 461 | 626             | 558 | 216            | 205 |
| H        | 462                     | 455 | 619             | 601 | 152            | 129 |
| B        | 449                     | 447 | 608             | 578 | 237            | 205 |
| C        | 449                     | 445 | 610             | 585 | 200            | 191 |
| Si       | 446                     | 444 | 714             | 680 | 230            | 195 |
| N        | 442                     | 445 | 578             | 558 | 224            | 191 |
| P        | 468                     | 460 | 629             | 587 | 224            | 140 |
| As       | 455                     | 448 | 630             | 606 | 216            | 181 |
| O        | 453                     | 450 | 613             | 594 | 264            | 246 |
| S        | 454                     | 452 | 644             | 628 | 227            | 202 |
| Se       | 458                     | 454 | 635             | 609 | 199            | 162 |
| Te       | 452                     | 454 | 652             | 615 | 161            | 175 |
| F        | 448                     | 455 | 672             | 651 | 153            | 180 |
| Cl       | 450                     | 448 | 694             | 671 | 143            | 113 |
| Br       | 458                     | 451 | 701             | 682 | 143            | 110 |
| I        | 453                     | 449 | 702             | 680 | 144            | 117 |

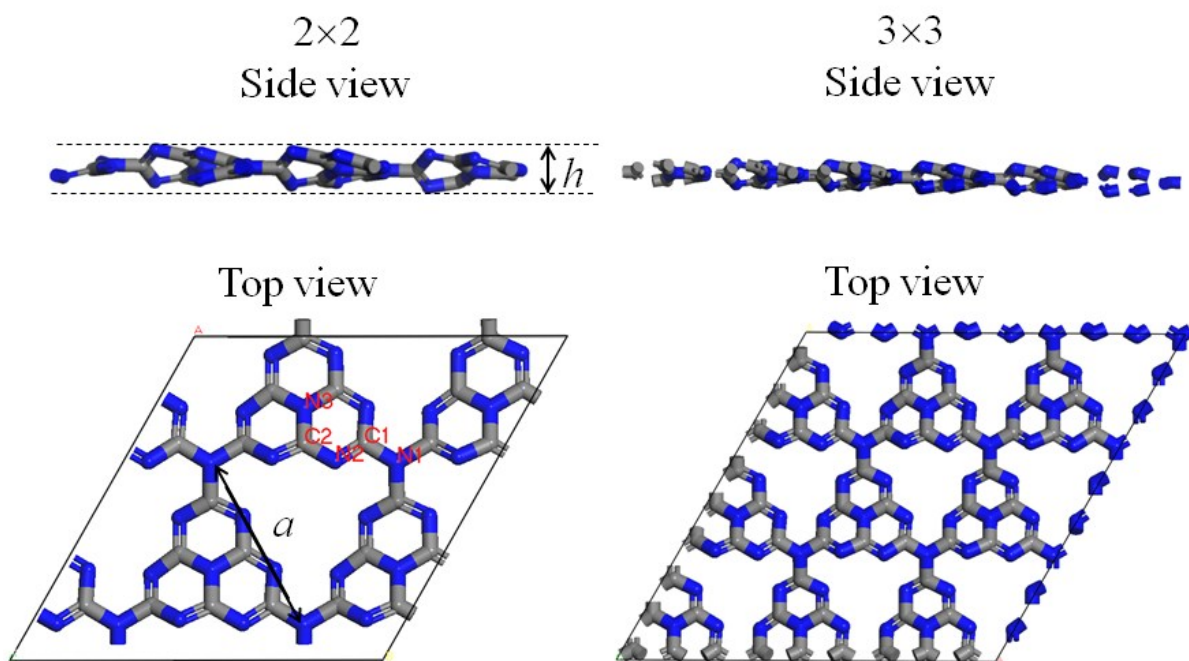

Figure S1. (Color online) Schematic structures of the  $2 \times 2$  and  $3 \times 3$  supercell  $g\text{-C}_3\text{N}_4$  monolayer, where the gray and blue spheres denote the C and N atoms.

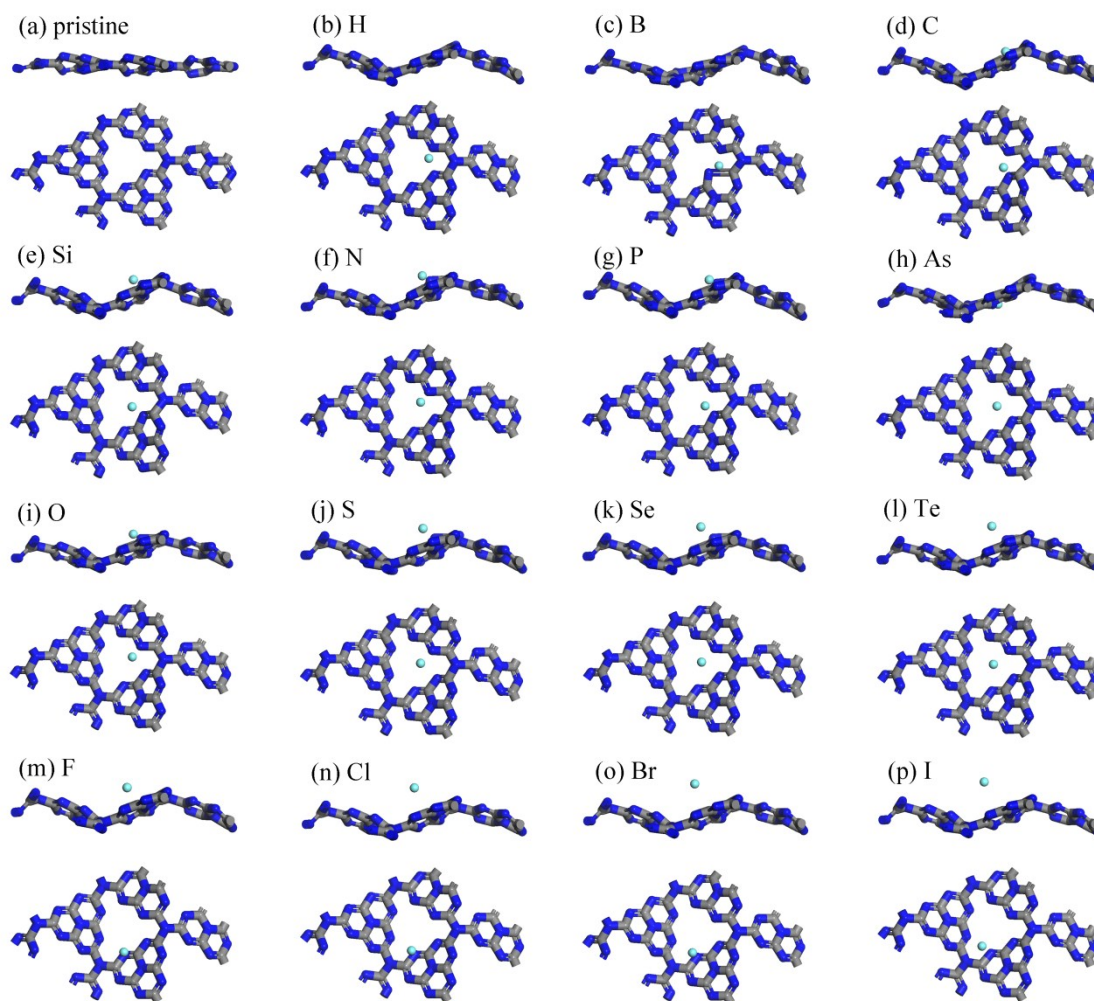

Figure S2. (Color online) The top and side views of (a)  $2 \times 2$  pristine  $g\text{-C}_3\text{N}_4$  monolayer and (b-p) the  $g\text{-C}_3\text{N}_4$  monolayer after absorbing nonmetal atoms, where gray, blue and wathet spheres are the C, N and nonmetal atoms.

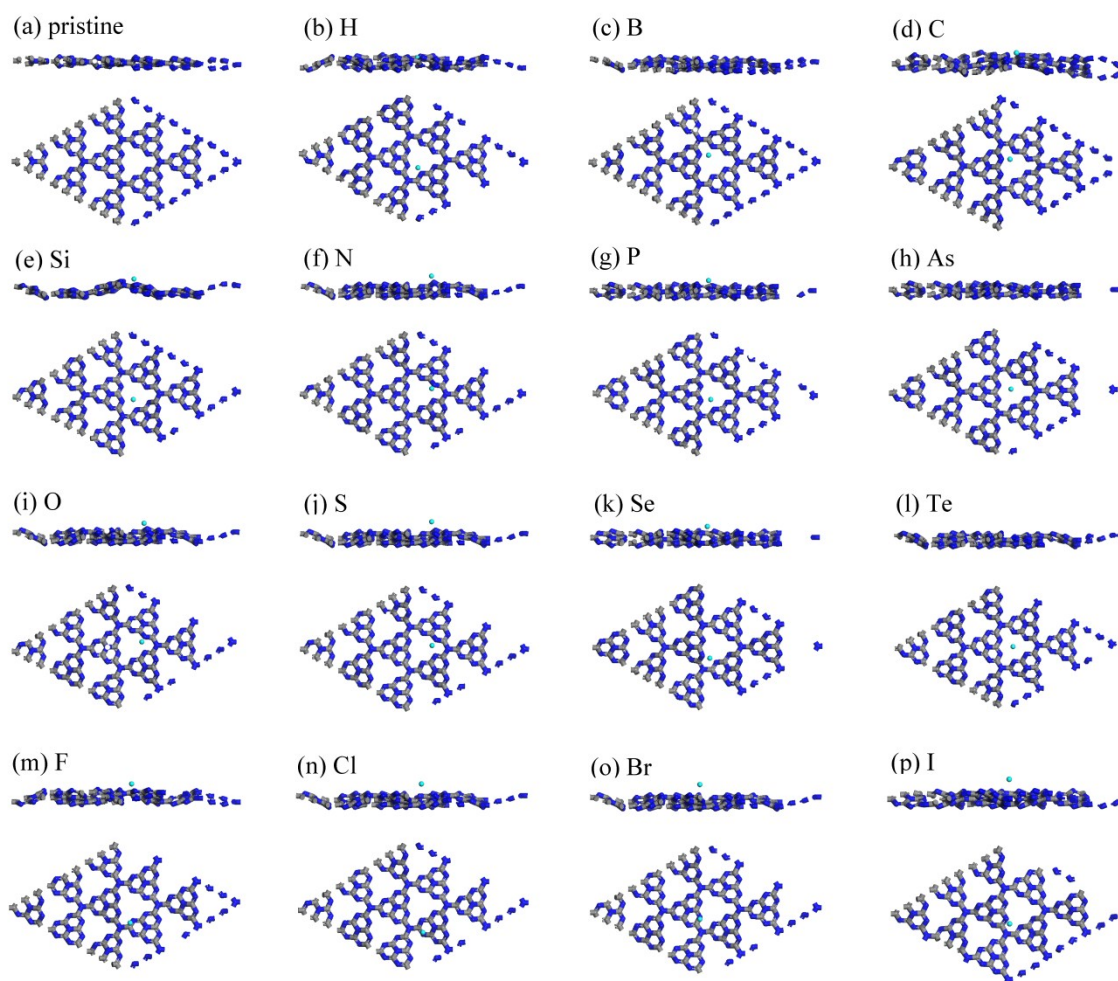

Figure S3. (Color online) The top and side views of (a)  $3 \times 3$  pristine g- $C_3N_4$  monolayer and (b-p) the g- $C_3N_4$  monolayer after absorbing nonmetal atoms, where gray, blue and wathet spheres are the C, N and nonmetal atoms.

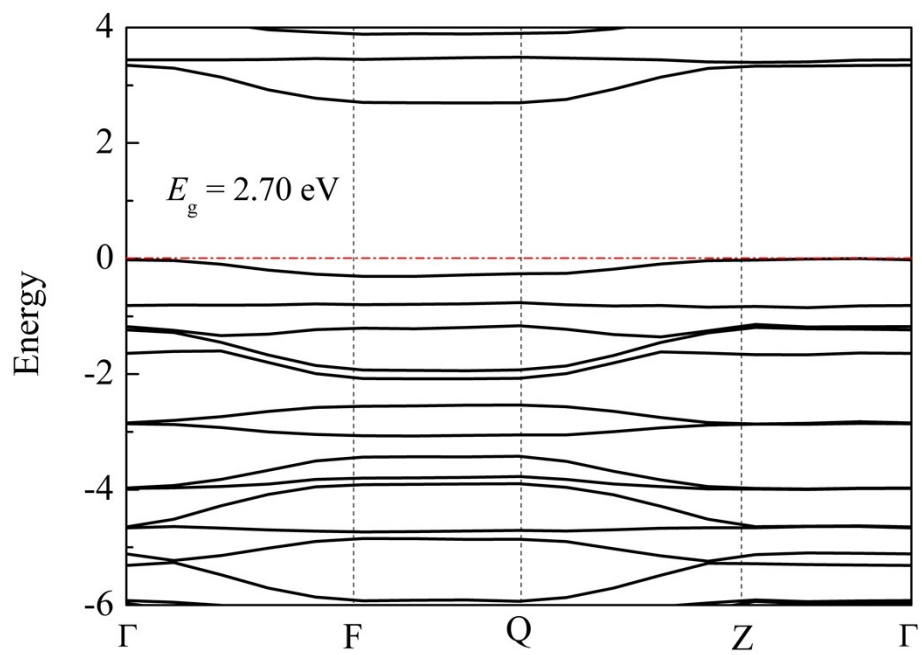

Figure S4. The band structure of pristine  $g\text{-C}_3\text{N}_4$  monolayer with hybrid functional.

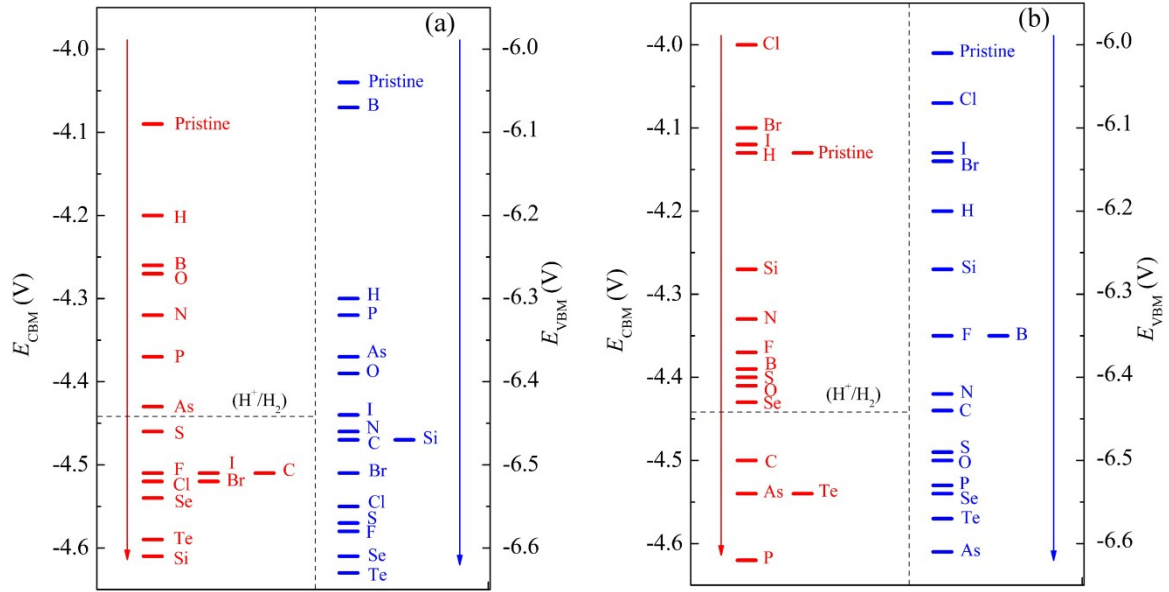

Figure S5. (Color online) The  $E_{CBM}$  and  $E_{VBM}$ , versus vacuum level of  $g\text{-C}_3\text{N}_4$  monolayer before and after absorbing nonmetal atom for (a)  $2 \times 2$  and (b)  $3 \times 3$  specimens.

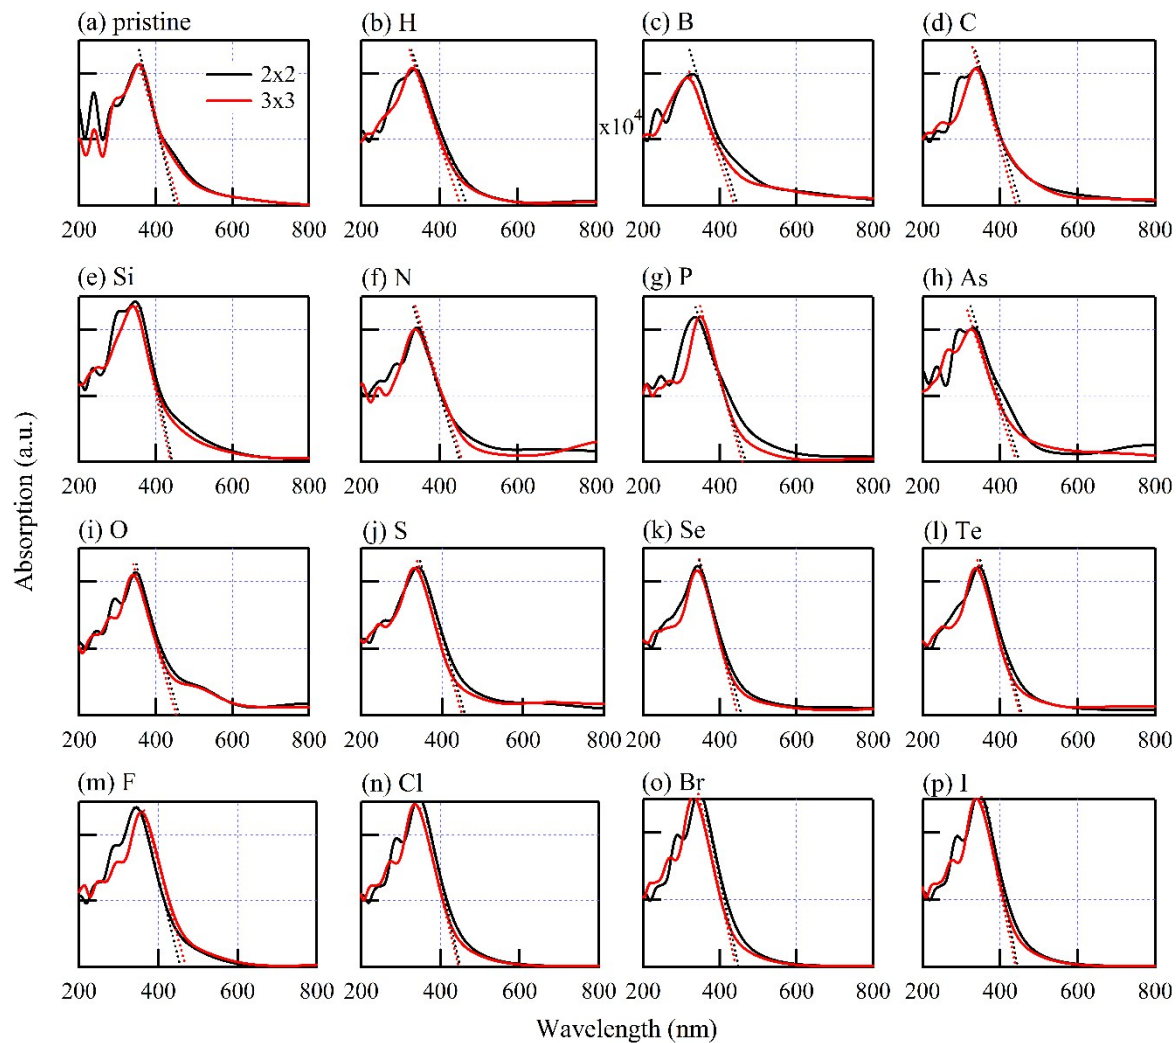

Figure S6. (Color online) The optical absorption curves of (a) pristine g-C<sub>3</sub>N<sub>4</sub> monolayer and (b-p) g-C<sub>3</sub>N<sub>4</sub> monolayer after absorbing nonmetal atoms for both 2×2 and 3×3 supercell specimens.
